# Supplementary material for: Rapid and sensitive quantification of cell-associated multi-walled carbon nanotubes
Source: Royal Society of Chemistry journal article supplement (doi:10.1039/d0nr03330h), 2020-01-01
Supplement: d0nr03330h1.pdf [file d0nr03330h1.pdf]

## Supporting Information

### Rapid and sensitive quantification of cellular associated multi-walled carbon nanotubes

Lukas Steinmetz, Joel Bourquin, Hana Barosova, Laetitia Haeni, Jessica Caldwell, Ana Milosevic, Christoph Geers, Mathias Bonmarin, Patricia Taladriz-Blanco, Barbara Rothen-Rutishauser, Alke Petri-Fink

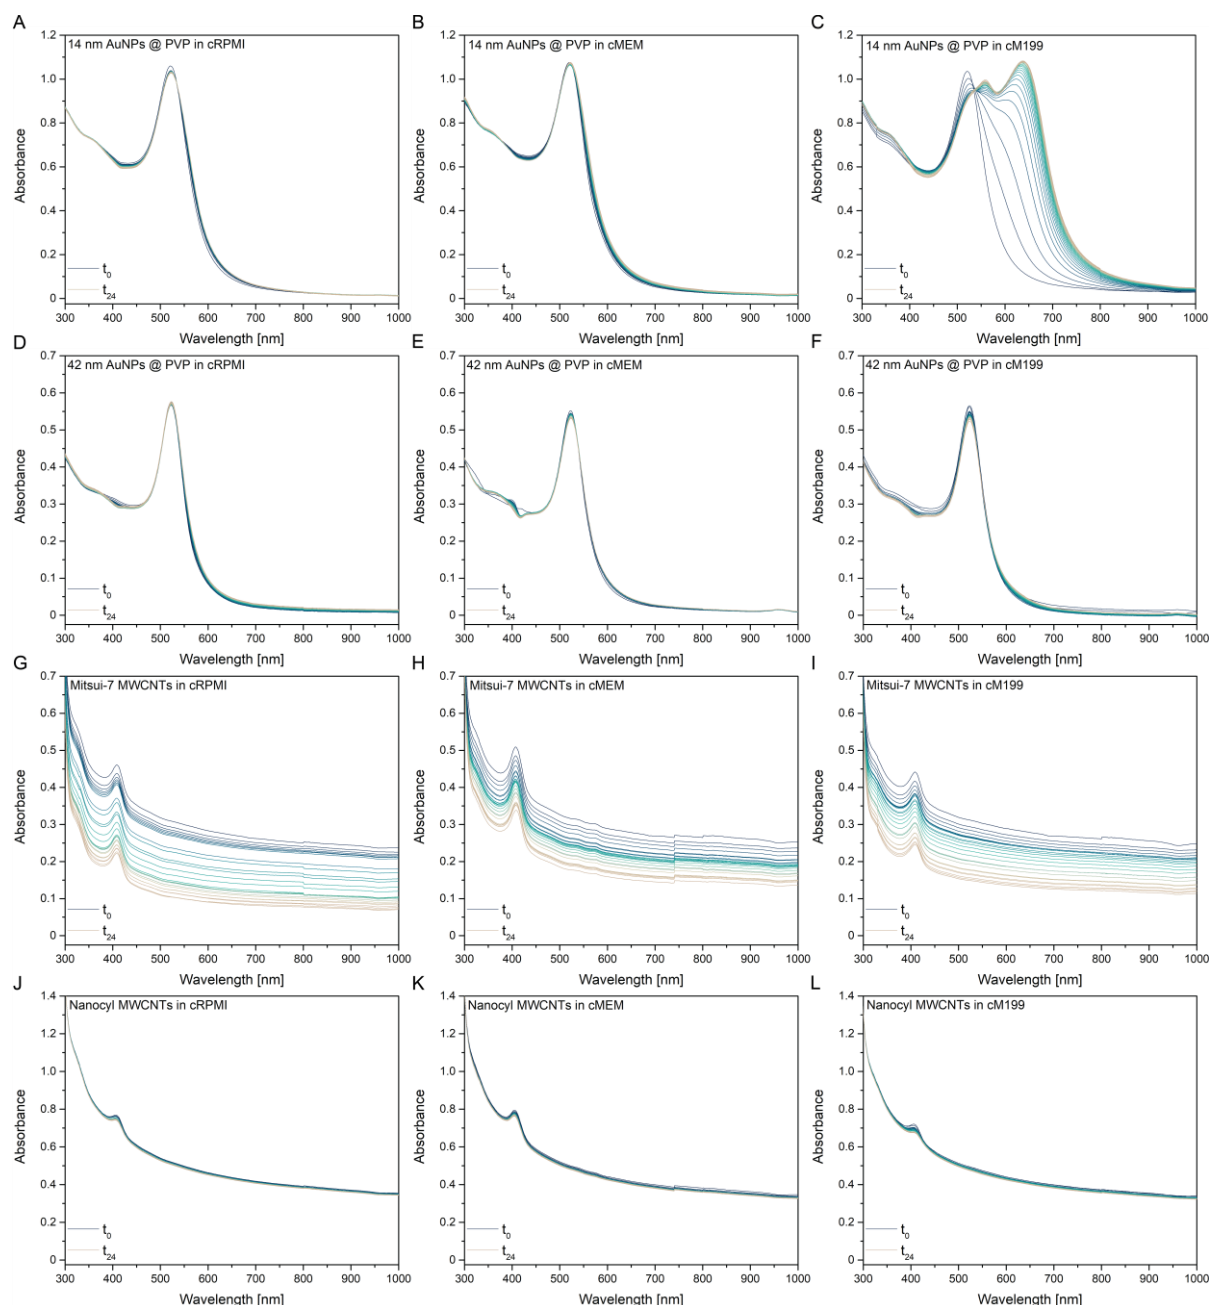

**Figure S1.** UV-Vis absorbance spectra of 14 & 42 nm AuNPs and Mitsui-7 & Nanocyl MWCNTs in complete cell culture media. Spectra were recorded over 24 h in one-hour steps. Extended signs of aggregation were only observed for 14 nm AuNPs in cM199. The reduction of absorbance over time for Mitsui-7 MWCNTs can be related to their sedimentation in the cuvette, which is caused by their relatively large size.

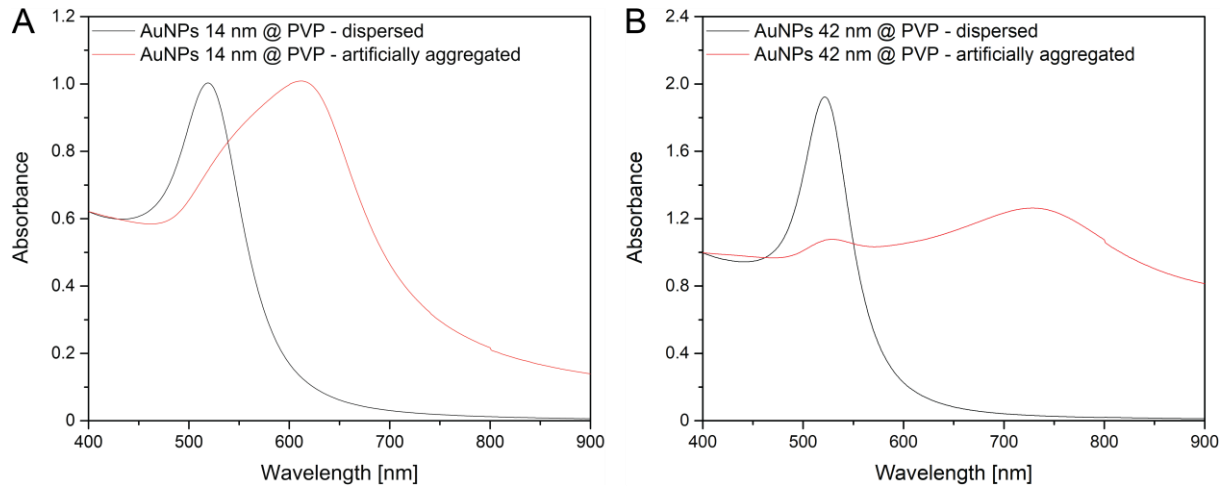

**Figure S2.** UV-Vis absorbance spectra of 14 nm (A) & 42 nm (B) AuNPs @ PVP. Dispersed and aggregated NPs are compared. Aggregation of NPs was achieved by the addition of 0.1 M HCl.

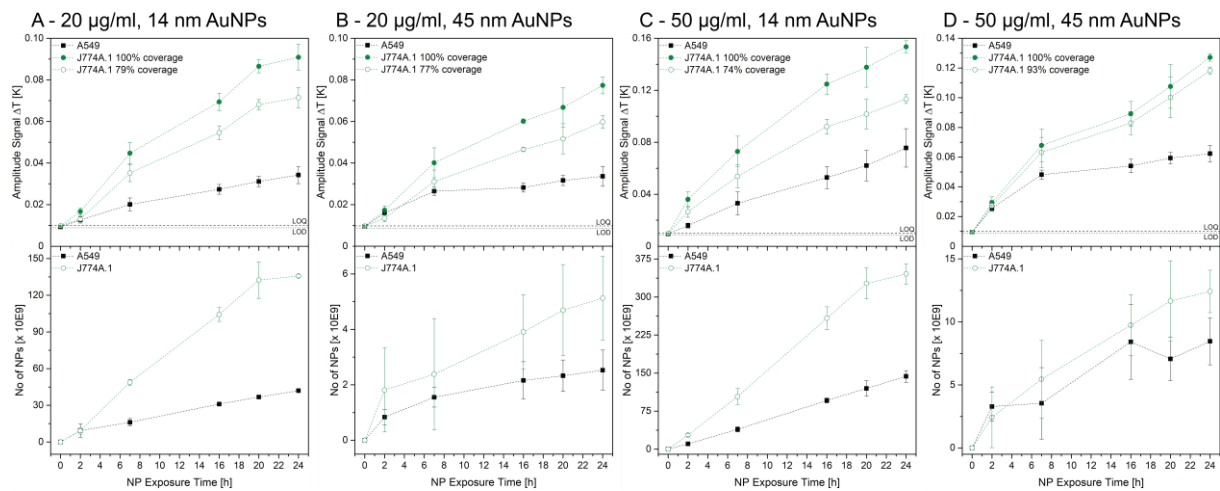

**Figure S3.** LIT AuNP-cell association trends (top row) and ICP-OES analysis (bottom row) for J774A.1 cells (macrophages). Due to their non-confluent growth pattern macrophages can not be directly compared to the investigated epithelial and mesothelial cells. Therefore, the cell coverage was determined (79 %, 77 %, 74 % and 93 %, for A-D) and normalized to a theoretical 100 % coverage.

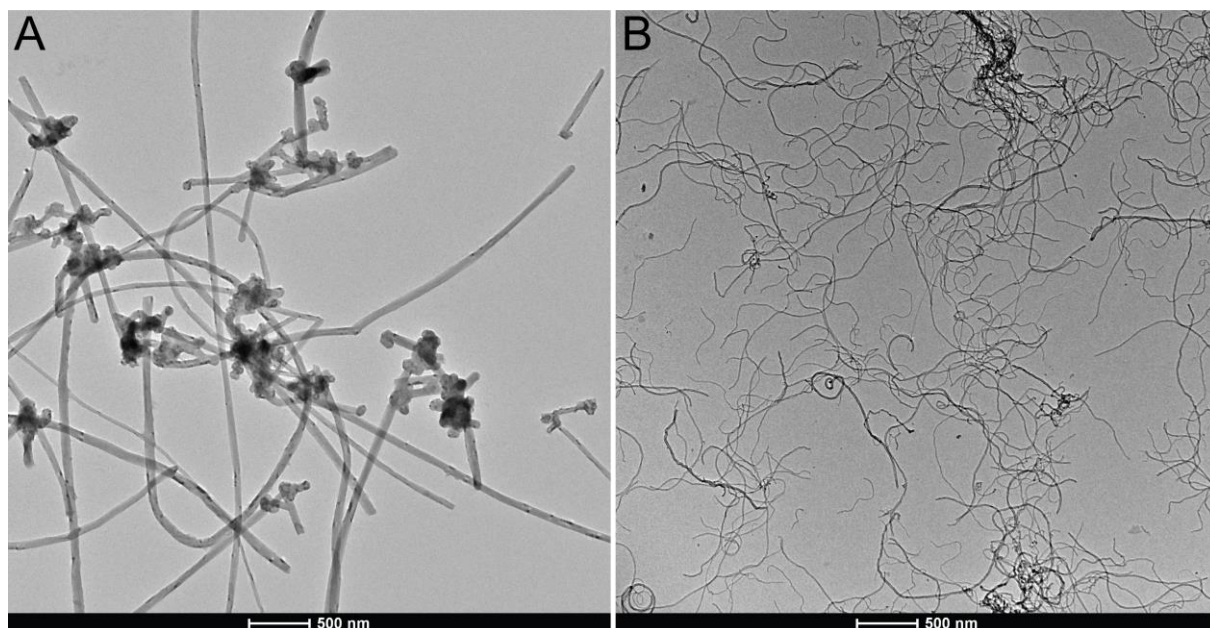

**Figure S4.** TEM micrographs of Mitsui-7 (A) & Nanocyl (B) MWCNTs in water, highlighting the difference in dimensions and stiffness.

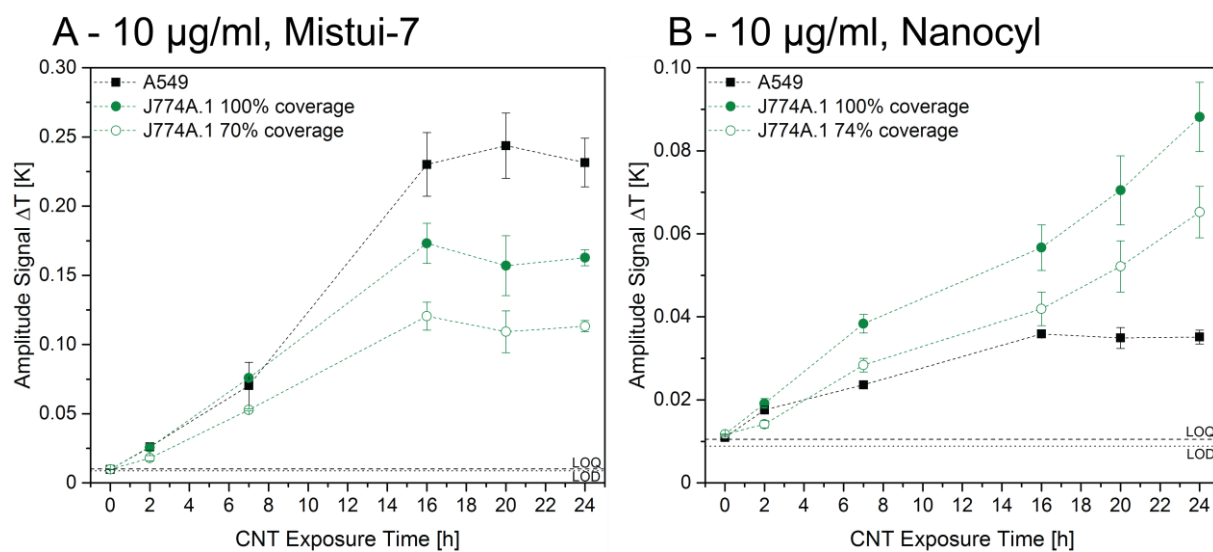

**Figure S5.** LIT MWCNT-association trends for J774A.1 cells (macrophages) at an exposure concentration of 10  $\mu\text{g/ml}$ . Cell coverage was determined (70 % A & 74 % B) and normalized to a theoretical 100 % coverage.

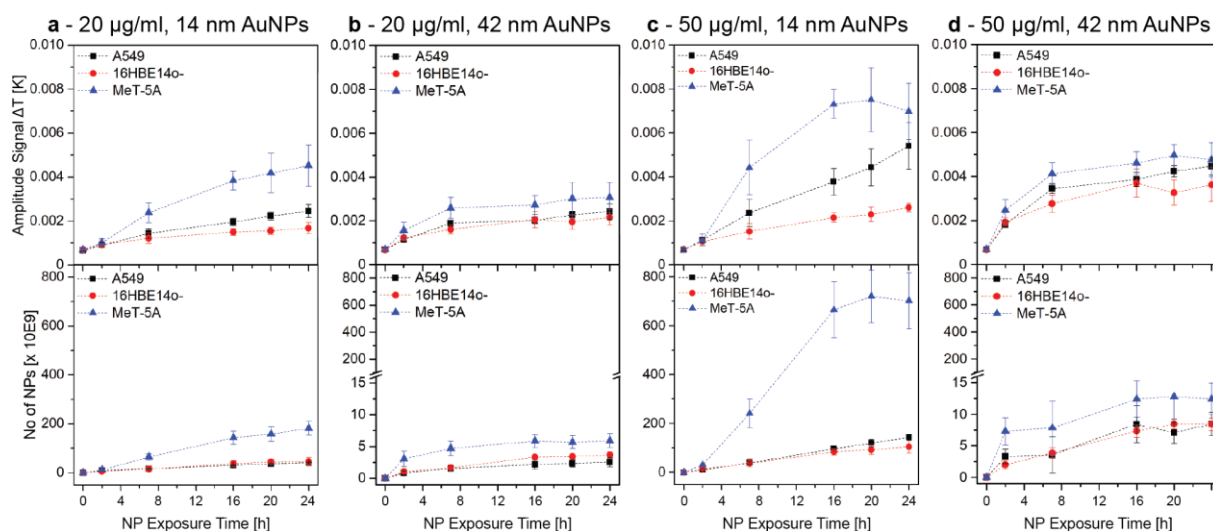

**Figure S6.** Re-printed Figure 3 with identical y-axes. AuNP-cell association trends over 24 h, obtained by LIT (top row, 525 nm excitation wavelength) and ICP-OES (bottom row). The association trends of A549, 16HBE14o-, and MeT-5A cells exposed to 20 and 50  $\mu\text{g/mL}$  of 14 nm (A, C) and 42 nm AuNPs (B, D) were investigated. Hence, it was possible to determine that, independent of the NP size and concentration, the AuNP association is higher for MeT-5A. The plateau reached under some conditions indicated a NP-cell association saturation.

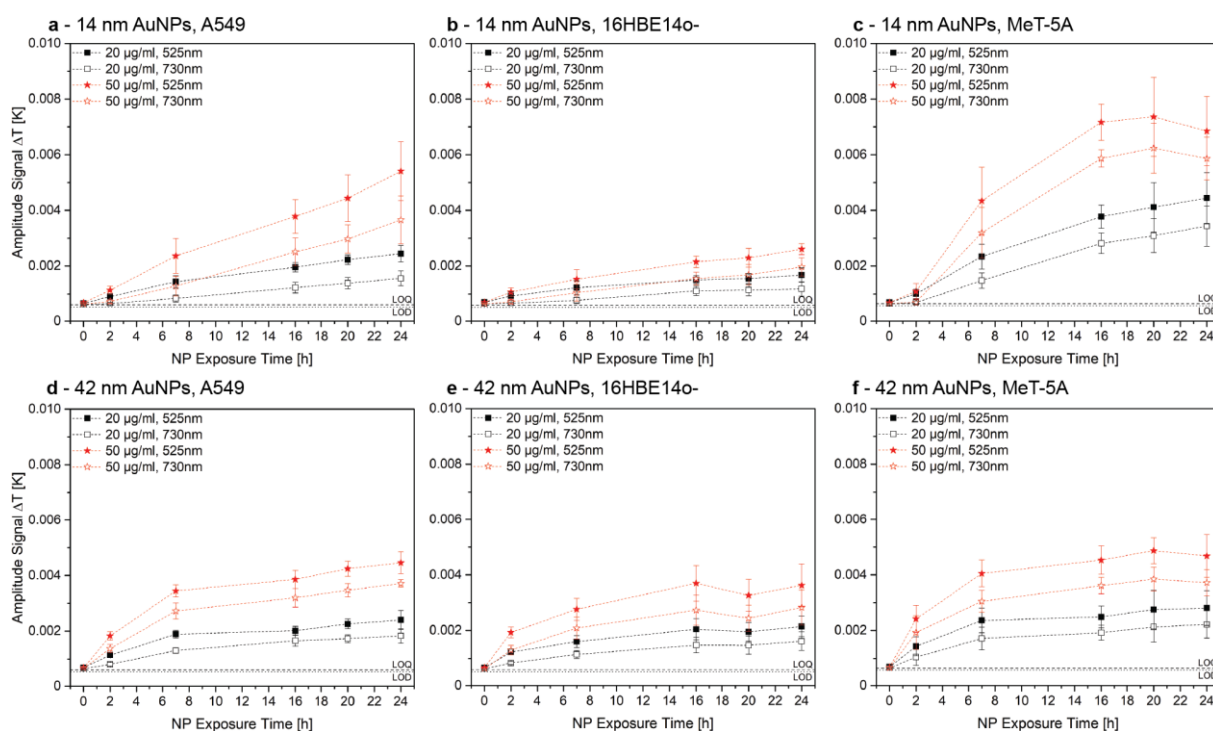

**Figure S7.** Re-printed Figure 4 with identical y-axes. Comparison of LIT measurements for cell-associated AuNPs at an excitation wavelength of 525 nm (closed symbols) and 730 nm (open symbols). The generation of heat at an excitation wavelength of 730 nm is a clear indication for NP aggregation. However, association trends for 20  $\mu\text{g/mL}$  (black symbols) and 50  $\mu\text{g/mL}$  (red symbols) evolve in an almost identical manner over time. Therefore, either all AuNPs aggregate due to the association or single NPs and aggregates associate to a similar extent.

|                        | <b>14 nm AuNPs</b> |         |          | <b>42 nm AuNPs</b> |          |          |
|------------------------|--------------------|---------|----------|--------------------|----------|----------|
| <i>[nm]</i>            | cRPMI              | cMEM    | cM199    | cRPMI              | cMEM     | cM199    |
| <i>t<sub>0</sub></i>   | 44 ± 23            | 36 ± 19 | 59 ± 15  | 132 ± 8            | 108 ± 15 | 118 ± 48 |
| <i>t<sub>1h</sub></i>  | 59 ± 10            | 40 ± 5  | 98 ± 22  | 117 ± 7            | 108 ± 15 | 116 ± 13 |
| <i>t<sub>5h</sub></i>  | 73 ± 3             | 36 ± 10 | 135 ± 13 | 111 ± 11           | 127 ± 20 | 124 ± 66 |
| <i>t<sub>24h</sub></i> | 70 ± 4             | 43 ± 1  | 144 ± 4  | 108 ± 6            | 119 ± 20 | 121 ± 1  |

**Table S1.** DDLS measurements of AuNPs in complete cell culture media, recorded over 24 h at 37°C.
